# Supplementary material for: Porous CuO nanotubes/graphene with sandwich architecture as high-performance anodes for lithium-ion batteries
Source: Royal Society of Chemistry journal article supplement (doi:10.1039/c6nr07802h), 2016-01-01
Supplement: c6nr07802h1.pdf [file c6nr07802h1.pdf]

## Supplementary Information

# Porous CuO Nanotubes/Graphene with Sandwich Architecture as High-performance Anodes for Lithium-ion Batteries

Shuning Xiao,<sup>ab</sup> Donglai Pan,<sup>a</sup> Liangjun Wang,<sup>c</sup> Zhengzhong Zhang,<sup>a</sup> Zhiyang Lyu,<sup>b</sup> Wenhao Dong,<sup>b</sup> Xiaolang Chen,<sup>a</sup> Dieqing Zhang,<sup>\*,a</sup> Wei Chen<sup>\*,abc</sup> and Hexing Li <sup>\*,a</sup>

<sup>a</sup> Education Ministry Key Lab of Resource Chemistry, Shanghai Key Laboratory of Rare Earth Functional Materials, International Joint Lab of Resource Chemistry SHNU-NUS-PU, Department of Chemistry, Shanghai Normal University, Shanghai 200234, China.

<sup>b</sup> Department of Chemistry, National University of Singapore, 3 Science Drive 3, 117543, Singapore.

<sup>c</sup> Department of Physics, National University of Singapore, 2 Science Drive 3, 117542, Singapore.

E-mail: Dieqing Zhang, dqzhang@shnu.edu.cn; Hexing Li, Hexing-li@shnu.edu.cn; Wei Chen, phycw@nus.edu.sg.

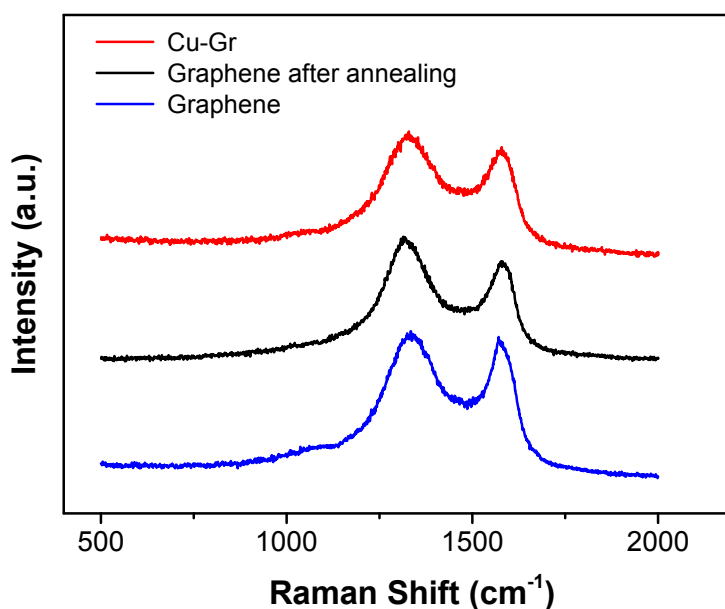

**Figure S1.** Raman spectra of the graphene before and after annealing in air at 300 °C, as well as the spectra of Cu-Gr.

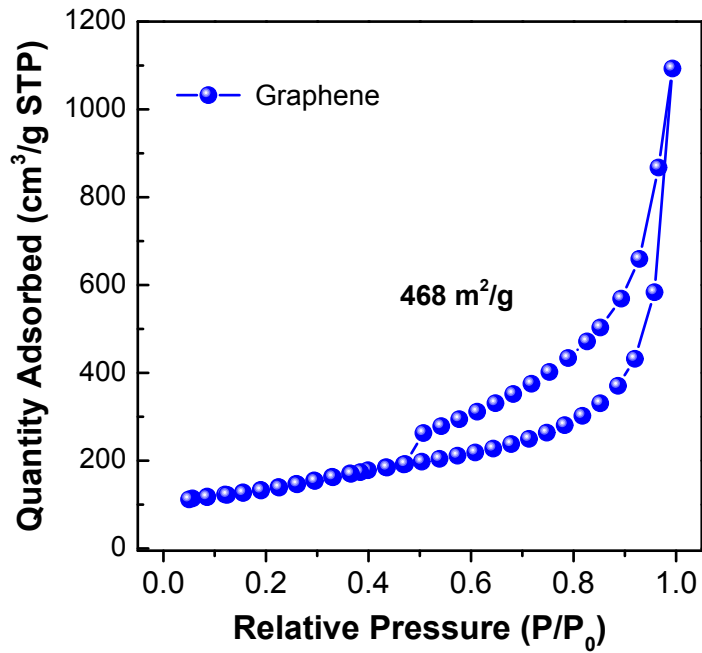

**Figure S2.** N<sub>2</sub> adsorption-desorption isotherms of graphene.

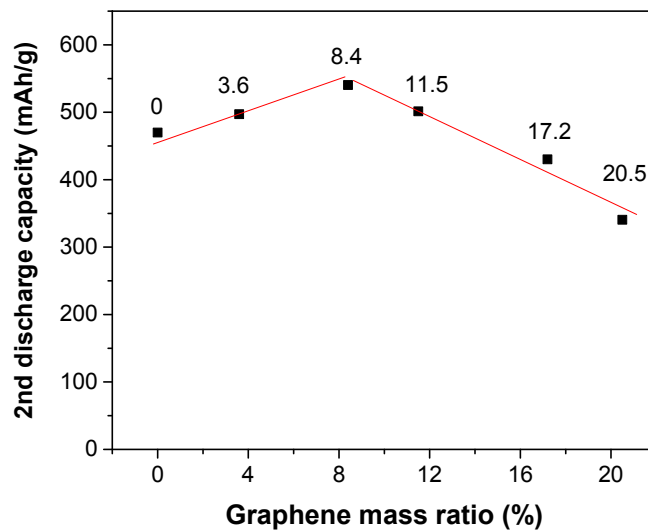

**Figure S3.** Materials optimization by controlling the mass ratio of graphene.

By increasing the amount of graphene from 0-8.4 wt%, the 2nd discharge capacity increases due to the well electron pathway created by graphene. Further increase from 8.4-20.5 wt% leads to the decrease of the capacity due to the reduced amount of CuO in the electrode since we are using the mass of CuO/graphene hybrids as the active materials for capacity calculation.

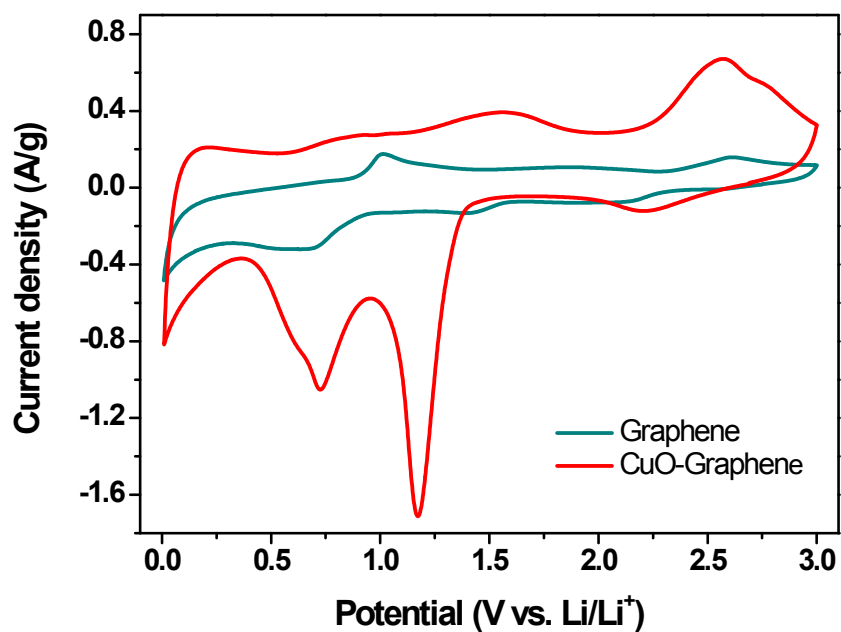

**Figure S4.** The 2<sup>nd</sup> cycle CV curves of pure graphene sample and CuO-Graphene hybrids at sweep rate of 0.5 mV/s in the potential window of 0.01-3.0 V vs. Li/Li<sup>+</sup>.

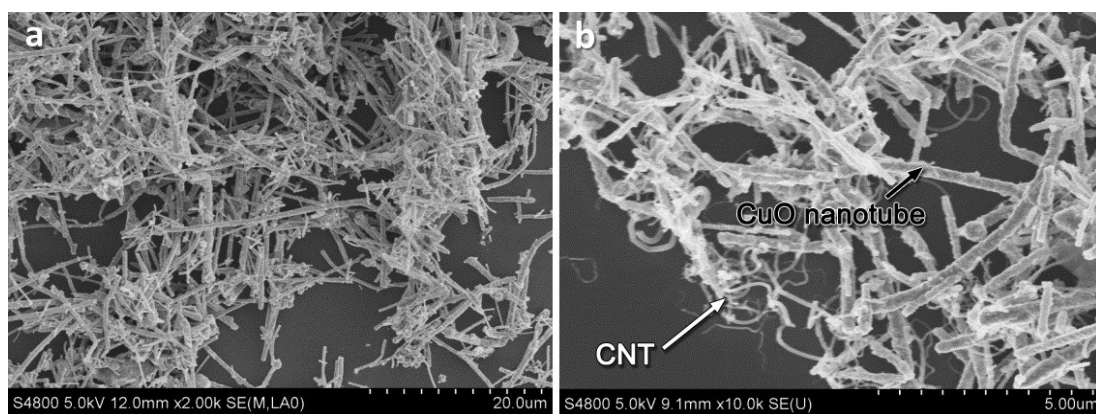

**Figure S5.** FESEM images of (a) CuO nanotubes and (b) CuO-CNT hybrid.

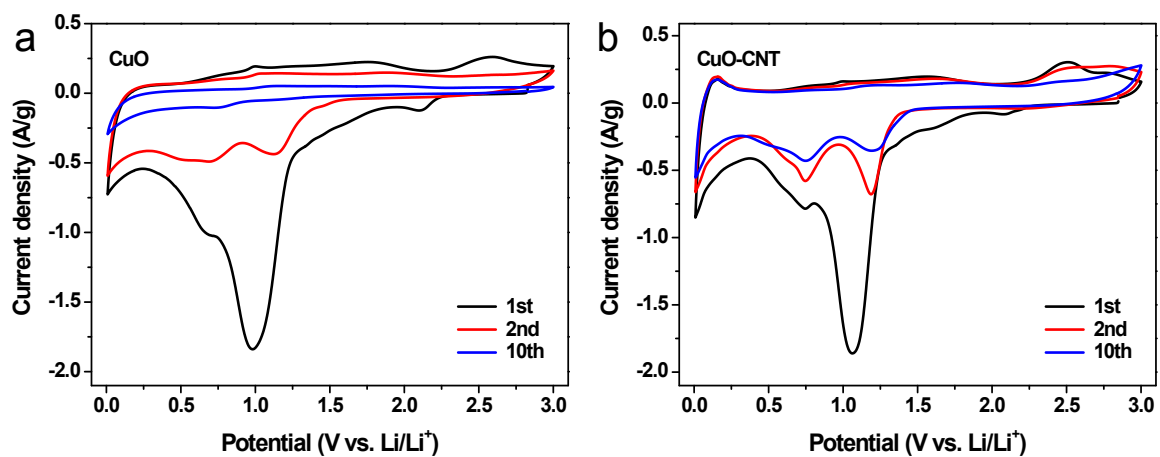

**Figure S6.** The 1<sup>st</sup>, 2<sup>nd</sup> and 10<sup>th</sup> cycle CV curves of CuO nanotubes and CuO-CNT hybrid.

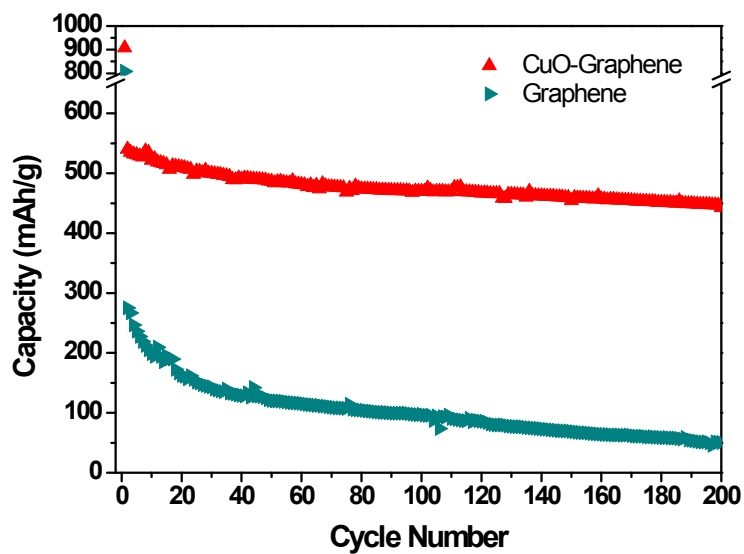

**Figure S7.** The long-term cycling performance at a current density of 500 mA/g for CuO-Gr and pure graphene.

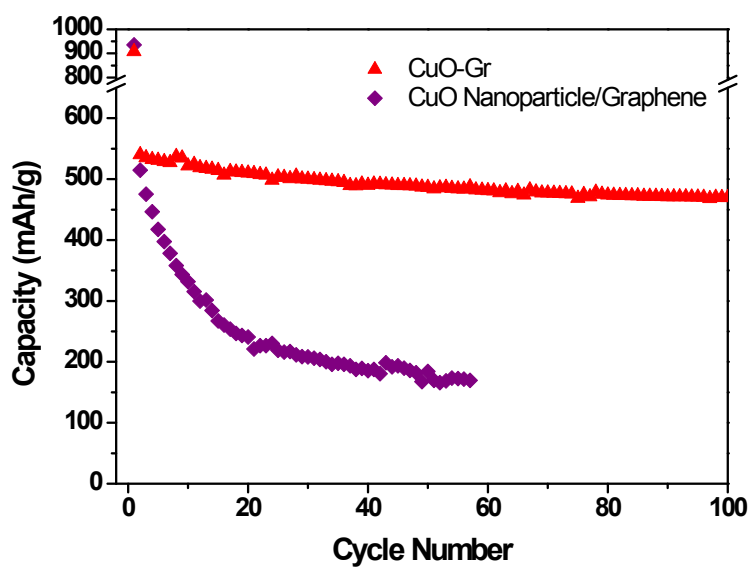

**Figure S8.** The long-term cycling performance at a current density of 500 mA/g for CuO-Gr and CuO nanoparticle/Graphene composite.

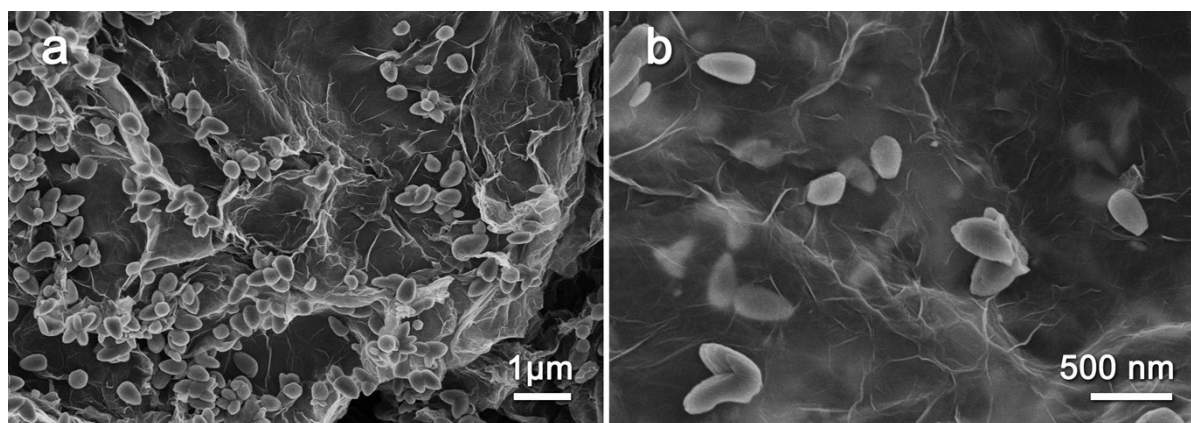

**Figure S9.** The SEM and high-resolution SEM images of CuO nanoparticle/Graphene composite.

**Table S1.** A survey of electrochemical properties of CuO-based and its hybrid composites in lithium ion batteries.

| <b>Anode materials</b>      | <b>Potential windows<br/>(V vs. Li)</b> | <b>Specific capacity<br/>(mAh/g)</b> | <b>Cycling stability</b>           | <b>Reference</b> |
|-----------------------------|-----------------------------------------|--------------------------------------|------------------------------------|------------------|
| <b>CuO-graphene</b>         | 0.01-3 V                                | 550 mAh/g at 500 mA/g                | ~81 % after 250 cycles at 500 mA/g | this work        |
| <b>CuO-CNT</b>              | 0.01-3 V                                | 500 mAh/g at 67 mA/g                 | ~100 % after 25 cycles at 67 mA/g  | 1                |
| <b>CuO-graphene</b>         | 0.01-3 V                                | 600 mAh/g at 65 mA/g                 | ~100% after 100 cycles at 65 mA/g  | 2                |
| <b>CuO hollow octahedra</b> | 0.01-3 V                                | 470 mAh/g at 100 mA/g                | ~87% after 100 cycles at 100 mA/g  | 3                |
| <b>CuO nanoplate</b>        | 0.01-3 V                                | 279.3 mAh/g at 670 mA/g              | ~ 80% after 70 cycles at 670 mA/g  | 4                |
| <b>CuO nanofiber</b>        | 0.005-3 V                               | 426 mAh/g at 100 mA/g                | ~94% after 100 cycles at 100 mA/g  | 5                |
| <b>CuO 3D mesocrystal</b>   | 0.01-3 V                                | 525.2 mAh/g at 67 mA/g               | ~100% after 500 cycles at 67 mA/g  | 6                |
| <b>CuO-graphene</b>         | 0.01-3 V                                | 736.8 mAh/g at 67 mA/g               | ~94.7% after 50 cycles at 67 mA/g  | 7                |
| <b>CuO-RGO</b>              | 0.01-3 V                                | 657 mAh/g at 50 mA/g                 | ~90% after 40 cycles at 50mA/g     | 8                |

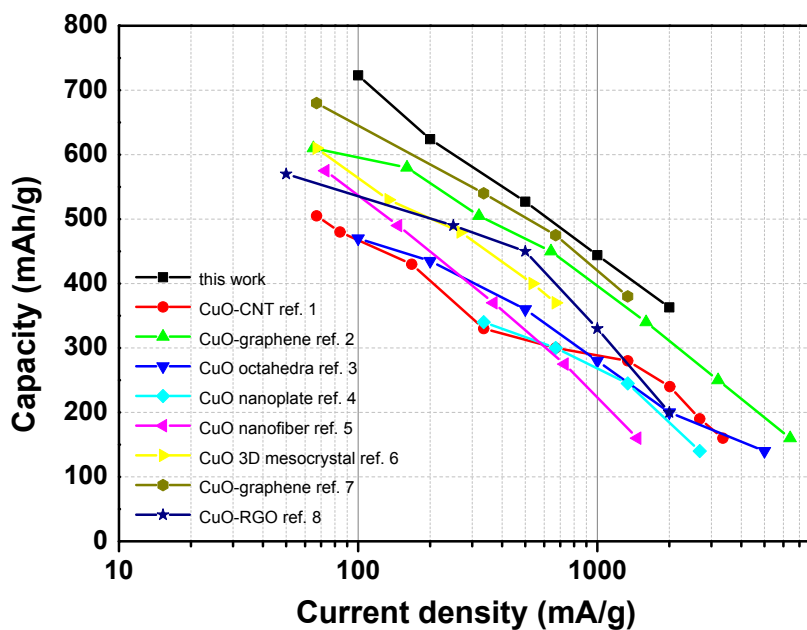

Figure S10. Rate-performance comparison of CuO-based anodes in Li-ion battery.

## Reference

1. *Chem. Mater.*, 2008, **20**, 3617-3622
2. *J. Mater. Chem.*, 2010, **20**, 10661-10664
3. *J. Mater. Chem. A*, 2013, **1**, 11126-11129
4. *Electrochim. Acta*, 2016, **206**, 217-225
5. *J. Phys. Chem. C*, 2012, **116**, 18087-18092
6. *J. Mater. Chem. A*, 2016, **4**, 8402-8411
7. *ACS Appl. Mater. Interfaces*, 2013, **5**, 9850-9855
8. *Nano Energy*, 2013, **2**, 1158-1163
